# Supplementary material for: Characterization of the Microenvironment of Nodular Lymphocyte Predominant Hodgkin Lymphoma
Source: Int J Mol Sci. 2016 Dec 16;17(12):2127. doi: 10.3390/ijms17122127 (PMC5187927; doi:10.3390/ijms17122127)
Supplement: Supplementary file 1 [file ijms-17-02127-s001.pdf]

# Supplementary Materials: Characterization of the Microenvironment of Nodular Lymphocyte Predominant Hodgkin Lymphoma

Lydia Visser, Rui Wu, Bea Rutgers, Arjan Diepstra and Anke van den Berg

**Table S1.** Leukocyte subpopulations and antibodies used.

| Leukocyte Subpopulation                    | Immunophenotype          | Company        |
|--------------------------------------------|--------------------------|----------------|
| B-cells                                    | CD20+                    | BD             |
| T-cells                                    | CD3+                     | Dako           |
| Th cells                                   | CD4+                     | BD             |
| Cytotoxic T-cells                          | CD8+                     | BD             |
| NK cells                                   | CD56+                    | IQ             |
| Macrophages                                | CD68+                    | R&D            |
| Double positive T-cells                    | CD4+CD8+                 | BD/BD          |
| Naïve Th cells                             | CCR7+CD45RA+ in CD4+     | R&D/Own lab/BD |
| Central memory Th cells (TCM)              | CCR7+CD45RA- in CD4+     | R&D/Own lab/BD |
| Effector memory Th cells (TEM)             | CCR7-CD45RA- in CD4+     | R&D/Own lab/BD |
| Terminally differentiated Th cells (TEMRA) | CCR7-CD45RA+ in CD4+     | R&D/Own lab/BD |
| Activation of Th cells                     | CD69+ in CD4+            | IQ/BD          |
|                                            | CD25 in CD4              | IQ/IQ          |
| Th1 cells                                  | CXCR3+ in CD4+           | R&D/IQ         |
| Th2 cells                                  | ST2L+ in CD4+            | R&D/BD         |
|                                            | CXCR4+ in CD4+           | R&D/IQ         |
| Regulatory T-cells                         | GITR+ in CD4+            | R&D/BD         |
|                                            | GITR+ CD25+ in CD4+      | R&D/I Q/BD     |
|                                            | CD127low in CD4+         | BD/BD          |
|                                            | CD127low CD25+ in CD4+   | BD/IQ/BD       |
|                                            | CD152+ in CD4+           | IQ/BD          |
|                                            | CD152+ CD25+ in CD4+     | IQ/IQ/BD       |
|                                            | FoxP3+ in CD4 +          | BD/BD          |
|                                            | CD25+ FOXP3 + in CD4+    | IQ/BD/BD       |
| T follicular helper cells                  | CD25+ CD45RA- inCD4+     | IQ/Own lab/BD  |
|                                            | CD57+ in CD4             | BD/BD          |
|                                            | PD-1+ in CD4             | Bio/BD         |
|                                            | PD-1+ CD57+ in CD4       | Bio/BD/BD      |
|                                            | CXCR5+ ICOS+ in CD4+     | BD/R&D/BD      |
|                                            | Bcl6+ in CD4+            | R&D/BD         |
|                                            | CXCR5+ BCL6+ in CD4+     | BD/R&D/BD      |
| T follicular helper regulatory cells       | Bcl6+ CD57+ in CD4+      | R&D/BD/BD      |
| Cytotoxic Th cells                         | CXCR5+ICOS+ in CD4+CD25+ | R&D/BD/BD/IQ   |
|                                            | TIA-1+ in CD4+           | IQ/BC          |
| Activation of cytotoxic T-cells            | Granzyme-B+ in CD4+      | IQ/BD          |
|                                            | CD25+ in CD8+            | IQ/BD          |
| Cytotoxic T-cells                          | CD69+ in CD8             | IQ/BD          |
|                                            | CXCR4+ in CD8+           | R&D/BD         |
|                                            | CXCR3+ in CD8+           | R&D/BD         |
|                                            | TIA-1+ in CD8+           | BC/BD          |
|                                            | Granzyme B+ in CD8+      | BD/BD          |

**Table S1.** *Cont.*

| <b>Leukocyte Subpopulation</b> | <b>Immunophenotype</b> | <b>Company</b> |
|--------------------------------|------------------------|----------------|
| NK cells                       | CD56+ in CD3–          | IQ/BD          |
|                                | CD16+ in CD3–          | R&D/BD         |
|                                | CD57+ in CD3–          | BD/BD          |
|                                | CD56+ CD16+ in CD3–    | IQ/R&D/BD      |
|                                | CD56+ CD107a+ in CD3–  | IQ/BD/BD       |
|                                | CD56+CD16+ in CD3+     | IQ/R&D/BD      |
| M2 Macrophages                 | CD163+in CD68+         | R&D/R&D        |

BD: BD Biosciences; IQ: IQ Products, Groningen, The Netherlands; R&D: R&D systems, Minneapolis, MN, USA; Dako: Dako Products, Glostrup, Denmark; BC: Beckman Coulter, Woerden, The Netherlands.
